# Supplementary material for: Construction and Mechanism Exploration of Highly Efficient System for Bacterial Ghosts Preparation Based on Engineered Phage ID52 Lysis Protein E
Source: MDPI journal article supplement (doi:10.3390/vaccines12050472), 2024-04-28
Supplement: s1 [file s1]

**Table S1.** Materials, including strains and plasmids used in our study.

| Strains                            | Description                                                                             | Source                  |
|------------------------------------|-----------------------------------------------------------------------------------------|-------------------------|
| DH5 $\alpha$                       | Host cells for plasmid amplification                                                    | TsingKe, Beijing, China |
| EcN $\Delta$ araBAD::FRT           | Deletion of <i>araBAD</i> gene and insertion of FRT locus in <i>E. coli</i> Nissle 1917 | Our lab                 |
| SP, <i>Salmonella</i> pullorum     | <i>Salmonella enterica</i> subsp. <i>enterica</i> serovar pullorum ATCC9120             | Our lab                 |
| SC, <i>Salmonella</i> choleraesuis | <i>Salmonella enterica</i> subsp. <i>Enterica</i> serovar choleraesuis ATCC13312        | Our lab                 |
| EcN $\Delta$ slyD                  | Deletion of <i>slyD</i> gene in EcN                                                     | This study              |
| EcN $\Delta$ dnaJ                  | Deletion of <i>dnaJ</i> gene in EcN                                                     | This study              |
| <b>Plasmids</b>                    |                                                                                         |                         |
| araC-ParaBAD-ID52-E                | The template for constructing gene vectors for mutant genes                             | Our lab                 |
| pBV220- $\phi$ X174-E              | The template for constructing expression vector of gene $\phi$ X174-E                   | Our lab                 |
| araC-ParaBAD-ID52-E-W4A            | Lysis plasmid used in this study                                                        | This study              |
| araC-ParaBAD-ID52-E-C61S           | The mutant gene of ID52-E                                                               | Our lab                 |
| araC-ParaBAD-ID52-E-C93S           | The mutant gene of ID52-E                                                               | Our lab                 |
| araC-ParaBAD-ID52-E-C61S&C93S      | The mutant gene of ID52-E                                                               | Our lab                 |
| araC-ParaBAD- $\phi$ X174-E        | Lysis plasmid used in this study                                                        | This study              |
| pLysS-pHLIP                        | The template for constructing expression vector of <i>mraY</i>                          | Our lab                 |
| pCas                               | Plasmid for CRISPR-Cas9                                                                 | Our lab                 |
| pTargetF                           | Plasmid for CRISPR-Cas9                                                                 | Our lab                 |

**Table S2.** Materials, including primers used in our study.

| Primers               |                                               |
|-----------------------|-----------------------------------------------|
| $\phi$ X174-E-F       | TCGAGCTCTAAGGAGGTTATAAAAAATGGTACGCTGGACTTTGTG |
| $\phi$ X174-E-R       | TCAAACCTGCGGATGAGACCACTCCTTCCGCACGTAATTT      |
| ID52-E-F              | ATGGAACGCTGGACCTTAAGC                         |
| ID52-E-R              | ACCGCCAGTACCGCGAC                             |
| E2V-F                 | GGTTATAAAAAATGGTACGCTGGACCTTAAGCGGCATT        |
| E2V-R                 | AATGCCGCTTAAGGTCCAGCGTACCATTTTTTATAACC        |
| R3A-F                 | TATAAAAAATGGAAGCGTGGACCTTAAGCGGCATTCTG        |
| R3A-R                 | CAGAATGCCGCTTAAGGTCCACGCTTCCATTTTTATA         |
| W4A-F                 | AAAAAATGGAACGCGCGACCTTAAGCGGCATTCTGGCG        |
| W4A-R                 | CGCCAGAATGCCGCTTAAGGTGCGCGCTTCCATTTTT         |
| S7W-F                 | ATGGAACGCTGGACCTTATGGGGCATTCTGGCGTTTCT        |
| S7W-R                 | AGAAACGCCAGAATGCCCCATAAGGTCCAGCGTTCCAT        |
| G8D-F                 | GAACGCTGGACCTTAAGCGATATTCTGGCGTTTCTGCT        |
| G8D-R                 | AGCAGAAACGCCAGAATATCGCTTAAGGTCCAGCGTTC        |
| I9T-F                 | CGCTGGACCTTAAGCGGCACCCTGGCGTTTCTGCTTCT        |
| I9T-R                 | AGAAGCAGAAACGCCAGGGTGCCGCTTAAGGTCCAGCG        |
| L10A-F                | CCTTAAGCGGCATTGCGGCGTTTCTGCTTCTGCTGAGC        |
| L10A-R                | GCTCAGCAGAAGCAGAAACGCCGCAATGCCGCTTAAGG        |
| P21A-F                | CTGCTGAGCCTGCTTCTGGCGAGCCTGCTGATTATGTT        |
| P21A-R                | AACATAATCAGCAGGCTCGCCAGAAGCAGGCTCAGCAG        |
| R33K-F                | TTATTCGAGCACCTTTAAACGCCCGGTGCTGAGCTGG         |
| R33K-R                | CCAGCTCAGCACCGGGCGTTTAAAGGTGCTCGGAATAA        |
| L37S-F                | ACCTTTCGCCGCGCGGTGTCAAGCTGGAAAGTGCAGAG        |
| L37S-R                | CTCTGCACCTTCCAGCTTGACACCGGGCGGCGAAAGGT        |
| F66C-F                | CTGCAGCCCGCTTCTGTGCAGCTTTGTGCCGGA             |
| F66C-R                | TTTCCGGCACAAAGCTGCACAGAAGCGGGCTGCAG           |
| S83C-F                | GATGCCGAAACAGACCTGCGTGAACAATATGCGC            |
| S83C-R                | GCGCATAGTTGTTACGCAGGTCTGTTTCGGCATC            |
| linearized            | TGGTCTCATCCGCAGTTTGA                          |
| araC-ParaBAD-ID52-E-F |                                               |
| linearized            | TTTTTATAACCTCCTTAGAGCTCGA                     |
| araC-ParaBAD-ID52-E-R |                                               |
| $\alpha$ 3-F          | GCTCTAAGGAGGTTATAAAAAATGGAACGCTGGACCTTAC      |
| $\alpha$ 3-R          | TCAAACCTGCGGATGAGACCAACCGCCAGTACCCAGTTT       |
| G4-F                  | GCTCTAAGGAGGTTATAAAAAATGGAACATTGGACTTTAAGC    |
| G4-R                  | TCAAACCTGCGGATGAGACCAACCGCCAGTACCCAGATCTT     |
| <i>mraY</i> -F        | TTAGTGGTGGTGGTGGTGGTAAACCACACCTCGATGTAAAT     |

*mraY*-R  
 linearized pLysS-pHLIP-F  
 linearized pLysS-pHLIP-R  
 SN20-F  
 SN20-R  
 DH20-F  
 DH20-R  
*slyD*-up1000-F  
*slyD*-up1000-R  
*slyD*-dn1000-F  
*slyD*-dn1000-R  
*dnaJ*-up1000-F  
*dnaJ*-up1000-R  
*dnaJ*-dn1000-F  
*dnaJ*-dn1000-R  
 $\Delta$ *slyD*-F  
 $\Delta$ *slyD*-R  
 $\Delta$ *dnaJ*-F  
 $\Delta$ *dnaJ*-R

AAAGGAAAGGAGGAAAGAAATAATGCTTGAGCAAGTCATTCTGTT  
 TATTTCTTTCTCCTTCCTTTCTTTT  
 GGTACACCACCACCACCACCACTAATT  
 CCTAGGTATAATACTAGTGTACCGGACCCTGGTCGGTTGTTTAGAGCTAGAAATAGC  
 ACTAGTATTATACCTAGGACTGAGC  
 CCTAGGTATAATACTAGTCATTCCGACTCTGGAAGAGTGTTTAGAGCTAGAAATAGC  
 ACTAGTATTATACCTAGGACTGAGC  
 GGCACCGAGTCGGTGACAGTGATTTCATCCATATCTCC  
 TTTCCATGCTCAGGAGATATCTATCGAAAAGGTGACAAAAA  
 TTTTGTACCTTTTCGATAGATATCTCCTGAGCATGGGAA  
 TCGACTCTAGAGAATTCAAAAAATCCGCATCAGGCGCA  
 GCACCGAGTCGGTGCAACCATGGGCGGTGTGATGA  
 AGGCTTTTGGGGAGGCTTTTGTATTGCCCCCTAG  
 GGCAATCAAAAAAGCCTCCCCAAAAGCCTGCCCG  
 GAGAATCAAAAAAGAATGACCAGGCCAGTATA  
 CGGGGATATCAGTGCCGTAA  
 AGACTTCACGCGAGCTTCGA  
 CGTAAAGATGTTAACCCGGAC  
 GATAGATAGCTGTTATCAAGGTACAC

Red letters indicate homology arms representing unrestricted cloning (RF-cloning) and polymerase chain reaction (PCR).

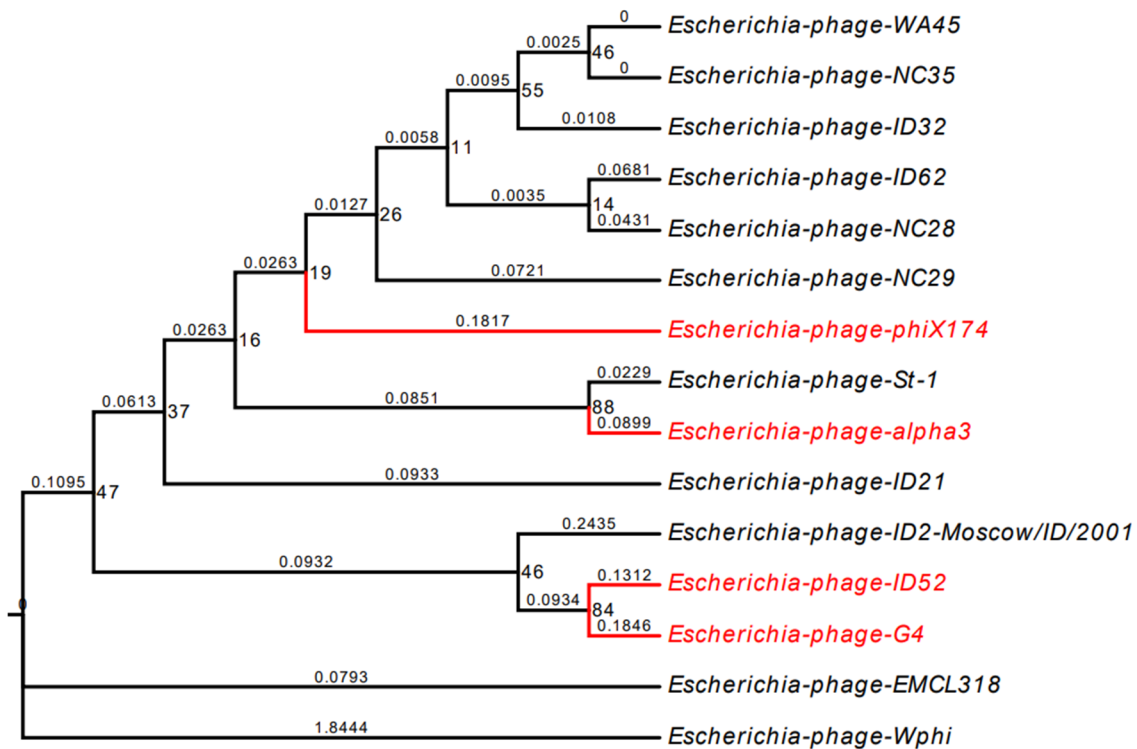

Figure S1. The evolutionary tree analysis of Enterobacteriaceae phage lysis gene E.

|                      |   |   |   |   |   |   |   |   |   |   |   |   |   |   |   |   |   |   |   |   |   |   |   |   |   |   |   |   |   |   |   |   |   |   |   |   |   |   |   |   |   |   |   |   |   |   |   |   |   |   |   |   |   |   |   |   |   |   |   |   |   |   |   |   |   |   |   |   |   |   |   |   |   |   |   |   |   |   |   |   |   |   |   |   |   |   |   |   |   |   |   |   |   |   |   |   |   |   |   |
|----------------------|---|---|---|---|---|---|---|---|---|---|---|---|---|---|---|---|---|---|---|---|---|---|---|---|---|---|---|---|---|---|---|---|---|---|---|---|---|---|---|---|---|---|---|---|---|---|---|---|---|---|---|---|---|---|---|---|---|---|---|---|---|---|---|---|---|---|---|---|---|---|---|---|---|---|---|---|---|---|---|---|---|---|---|---|---|---|---|---|---|---|---|---|---|---|---|---|---|---|---|
| 1. ID52-E            | M | E | R | V | T | L | S | G | I | A | F | L | L | L | S | L | L | P | S | L | L | I | F | I | P | S | T | F | R | R | P | V | L | S | K | V | Q | S | L | P | K | T | S | L | M | V | S | N | A | L | L | R | P | N | C | S | P | L | L | F | S | F | V | P | E | T | K | T | L | L | V | M | P | K | Q | T | S | V | N | N | A | L | K | E | L | C | N | E | K | I | N | S | P | L | R | R | G | T | G |
| 2. ID52-E-E2V        | M | V | R | V | T | L | S | G | I | A | F | L | L | L | S | L | L | P | S | L | L | I | F | I | P | S | T | F | R | R | P | V | L | S | K | V | Q | S | L | P | K | T | S | L | M | V | S | N | A | L | L | R | P | N | C | S | P | L | L | F | S | F | V | P | E | T | K | T | L | L | V | M | P | K | Q | T | S | V | N | N | A | L | K | E | L | C | N | E | K | I | N | S | P | L | R | R | G | T | G |
| 3. ID52-E-R3A        | M | E | A | V | T | L | S | G | I | A | F | L | L | L | S | L | L | P | S | L | L | I | F | I | P | S | T | F | R | R | P | V | L | S | K | V | Q | S | L | P | K | T | S | L | M | V | S | N | A | L | L | R | P | N | C | S | P | L | L | F | S | F | V | P | E | T | K | T | L | L | V | M | P | K | Q | T | S | V | N | N | A | L | K | E | L | C | N | E | K | I | N | S | P | L | R | R | G | T | G |
| 4. ID52-E-W4A        | M | E | A | V | T | L | S | G | I | A | F | L | L | L | S | L | L | P | S | L | L | I | F | I | P | S | T | F | R | R | P | V | L | S | K | V | Q | S | L | P | K | T | S | L | M | V | S | N | A | L | L | R | P | N | C | S | P | L | L | F | S | F | V | P | E | T | K | T | L | L | V | M | P | K | Q | T | S | V | N | N | A | L | K | E | L | C | N | E | K | I | N | S | P | L | R | R | G | T | G |
| 5. ID52-E-S7W        | M | E | R | V | T | L | S | G | I | A | F | L | L | L | S | L | L | P | S | L | L | I | F | I | P | S | T | F | R | R | P | V | L | S | K | V | Q | S | L | P | K | T | S | L | M | V | S | N | A | L | L | R | P | N | C | S | P | L | L | F | S | F | V | P | E | T | K | T | L | L | V | M | P | K | Q | T | S | V | N | N | A | L | K | E | L | C | N | E | K | I | N | S | P | L | R | R | G | T | G |
| 6. ID52-E-G8D        | M | E | R | V | T | L | S | G | I | A | F | L | L | L | S | L | L | P | S | L | L | I | F | I | P | S | T | F | R | R | P | V | L | S | K | V | Q | S | L | P | K | T | S | L | M | V | S | N | A | L | L | R | P | N | C | S | P | L | L | F | S | F | V | P | E | T | K | T | L | L | V | M | P | K | Q | T | S | V | N | N | A | L | K | E | L | C | N | E | K | I | N | S | P | L | R | R | G | T | G |
| 7. ID52-E-19T        | M | E | R | V | T | L | S | G | I | A | F | L | L | L | S | L | L | P | S | L | L | I | F | I | P | S | T | F | R | R | P | V | L | S | K | V | Q | S | L | P | K | T | S | L | M | V | S | N | A | L | L | R | P | N | C | S | P | L | L | F | S | F | V | P | E | T | K | T | L | L | V | M | P | K | Q | T | S | V | N | N | A | L | K | E | L | C | N | E | K | I | N | S | P | L | R | R | G | T | G |
| 8. ID52-E-L10A       | M | E | R | V | T | L | S | G | I | A | F | L | L | L | S | L | L | P | S | L | L | I | F | I | P | S | T | F | R | R | P | V | L | S | K | V | Q | S | L | P | K | T | S | L | M | V | S | N | A | L | L | R | P | N | C | S | P | L | L | F | S | F | V | P | E | T | K | T | L | L | V | M | P | K | Q | T | S | V | N | N | A | L | K | E | L | C | N | E | K | I | N | S | P | L | R | R | G | T | G |
| 9. ID52-E-P21A       | M | E | R | V | T | L | S | G | I | A | F | L | L | L | S | L | L | P | S | L | L | I | F | I | P | S | T | F | R | R | P | V | L | S | K | V | Q | S | L | P | K | T | S | L | M | V | S | N | A | L | L | R | P | N | C | S | P | L | L | F | S | F | V | P | E | T | K | T | L | L | V | M | P | K | Q | T | S | V | N | N | A | L | K | E | L | C | N | E | K | I | N | S | P | L | R | R | G | T | G |
| 10. ID52-E-R33K      | M | E | R | V | T | L | S | G | I | A | F | L | L | L | S | L | L | P | S | L | L | I | F | I | P | S | T | F | R | R | P | V | L | S | K | V | Q | S | L | P | K | T | S | L | M | V | S | N | A | L | L | R | P | N | C | S | P | L | L | F | S | F | V | P | E | T | K | T | L | L | V | M | P | K | Q | T | S | V | N | N | A | L | K | E | L | C | N | E | K | I | N | S | P | L | R | R | G | T | G |
| 11. ID52-E-L37S      | M | E | R | V | T | L | S | G | I | A | F | L | L | L | S | L | L | P | S | L | L | I | F | I | P | S | T | F | R | R | P | V | L | S | K | V | Q | S | L | P | K | T | S | L | M | V | S | N | A | L | L | R | P | N | C | S | P | L | L | F | S | F | V | P | E | T | K | T | L | L | V | M | P | K | Q | T | S | V | N | N | A | L | K | E | L | C | N | E | K | I | N | S | P | L | R | R | G | T | G |
| 12. ID52-E-P66C      | M | E | R | V | T | L | S | G | I | A | F | L | L | L | S | L | L | P | S | L | L | I | F | I | P | S | T | F | R | R | P | V | L | S | K | V | Q | S | L | P | K | T | S | L | M | V | S | N | A | L | L | R | P | N | C | S | P | L | L | F | S | F | V | P | E | T | K | T | L | L | V | M | P | K | Q | T | S | V | N | N | A | L | K | E | L | C | N | E | K | I | N | S | P | L | R | R | G | T | G |
| 13. ID52-E-S83C      | M | E | R | V | T | L | S | G | I | A | F | L | L | L | S | L | L | P | S | L | L | I | F | I | P | S | T | F | R | R | P | V | L | S | K | V | Q | S | L | P | K | T | S | L | M | V | S | N | A | L | L | R | P | N | C | S | P | L | L | F | S | F | V | P | E | T | K | T | L | L | V | M | P | K | Q | T | S | V | N | N | A | L | K | E | L | C | N | E | K | I | N | S | P | L | R | R | G | T | G |
| 14. ID52-E-P66C S83C | M | E | R | V | T | L | S | G | I | A | F | L | L | L | S | L | L | P | S | L | L | I | F | I | P | S | T | F | R | R | P | V | L | S | K | V | Q | S | L | P | K | T | S | L | M | V | S | N | A | L | L | R | P | N | C | S | P | L | L | F | S | F | V | P | E | T | K | T | L | L | V | M | P | K | Q | T | S | V | N | N | A | L | K | E | L | C | N | E | K | I | N | S | P | L | R | R | G | T | G |

Figure S2. Comparison of the amino acid sequences of wild-type and mutant of phage ID52 lysis protein E.

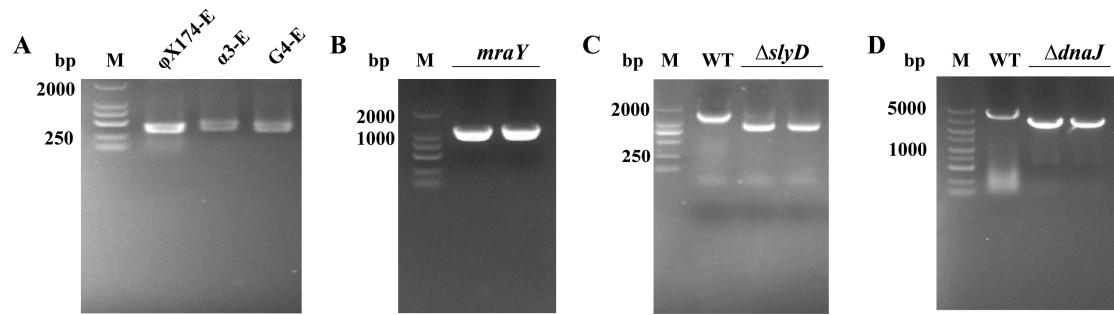

**Figure S3.** Colony analysis by agarose gel electrophoresis. (A) *E. coli* DH5 $\alpha$  colonies containing plasmids araC-ParaBAD- $\phi$ X174-E, araC-ParaBAD-G4-E, and araC-ParaBAD- $\alpha$ 3-E, respectively. (B) *E. coli* DH5 $\alpha$  colonies containing plasmids pLysS-*mraY*. (C) Colony PCR to identify the deletion of *slyD* gene in EcN. (D) Colony PCR to identify the deletion of *dnaJ* gene in EcN.

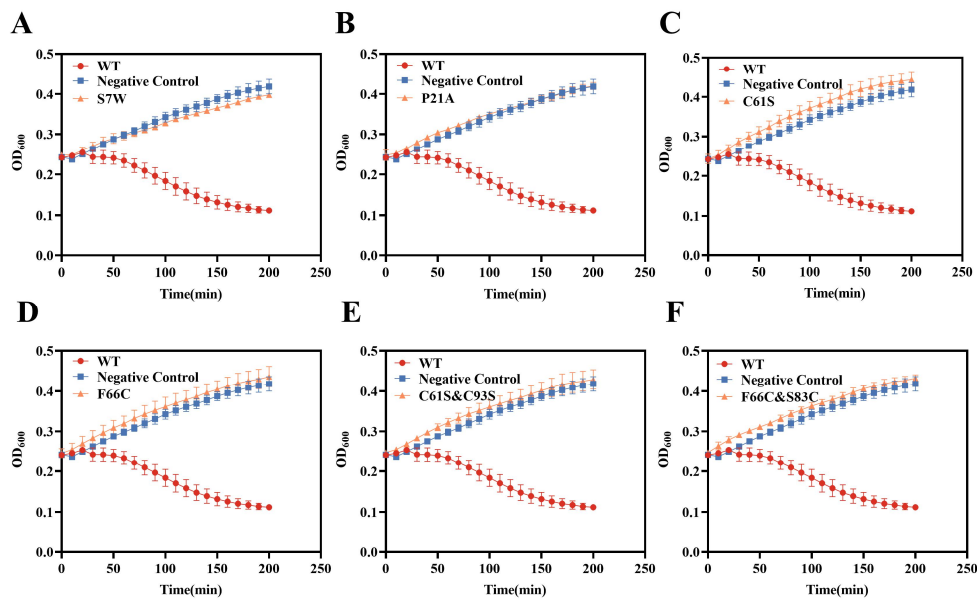

**Figure S4.** The lysis curves of EcN mutated to lose activity. The growth curves of at least five replicates of each mutant were monitored using OD<sub>600</sub>.

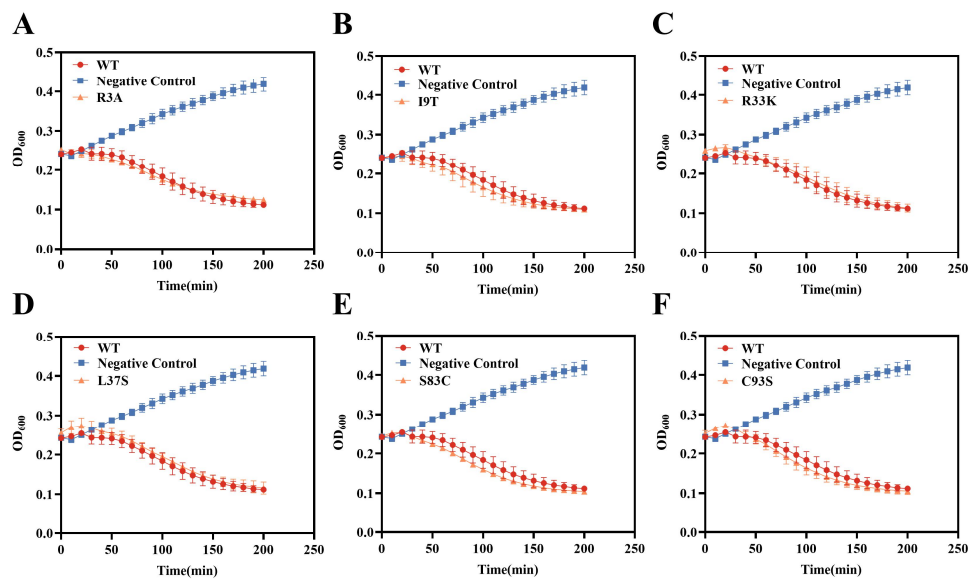

**Figure S5.** The lysis curves of the EcN mutant were not significantly affected. The growth curves of at least five replicates of each mutant were monitored using OD<sub>600</sub>.

**Table S3.** Agricultural productivity and yield of two lysis proteins.

| Lysis Protein E | Induction of OD600 | Agricultural Productivity | Yield     |
|-----------------|--------------------|---------------------------|-----------|
| ID52-E-W4A      | 6.0                | 60.39%                    | 0.223 g/L |
| ID52-E-W4A      | 4.0                | 44.08%                    | 0.185 g/L |
| φX174-E         | 4.0                | 3.09%                     | 0.014 g/L |

Western blot of the samples manifested that the lysis protein ID52-E-W4A could be expressed in EcN. The lysis protein ID52-E-W4A encoded 103 amino acids with the addition of the Strep-tag II tag and a molecular weight size of 12.93 kDa.

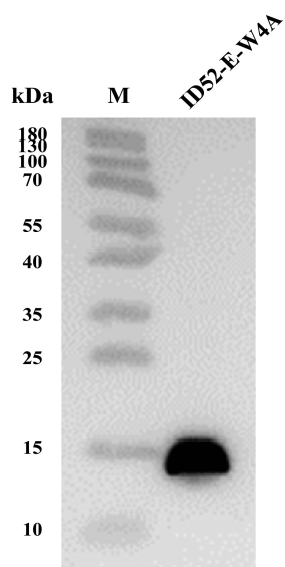**Figure S6.** The expression of lysis protein ID52-E-W4A was verified by Western blot. M: 26616 pre-stained protein marker.**Table S4.** The inactivated efficiency of different lysis protein E in EcN.

| Initial Induction<br>OD <sub>600</sub> values | Inactivated Efficiency (%) |         |
|-----------------------------------------------|----------------------------|---------|
|                                               | ID52-E                     | φX174-E |
| 0.8                                           | 99.994                     | 92.727  |
| 1.2                                           | 99.950                     | 97.142  |
| 1.6                                           | 99.952                     | 98.500  |
| 2.0                                           | 99.428                     | 99.883  |
